# Supplementary material for: Association Between Maternal Exposure to Intimate Partner Violence and Nutritional Outcomes: A Secondary Data Analysis of Demographic Health Survey (DHS) from Four South Asian Countries
Source: Research Square preprint supplement (doi:10.21203/rs.3.rs-6810413/v1), 2025-06-17
Supplement: Supplementary file 1 [file fe33952297c183dd01976293.docx]

| **IPV variable** | **Variable** | **Description** |
| --- | --- | --- |
| Physical IPV | d105a | ever been pushed, shook or had something thrown by husband/partner |
| d105b | ever been slapped by husband/partner |
| d105c | ever been punched with fist or hit by something harmful by husband/partner |
| d105d | ever been kicked or dragged by husband/partner |
| d105e | ever been strangled or burnt by husband/partner |
| d105f | ever been threatened with knife/gun or other weapon by husband/partner |
| d105g | ever faced physical violence by husband/partner |
| d105j | ever had arm twisted or hair pulled by husband/partner |
| Emotional IPV | d103a | ever been humiliated by husband/partner |
| d103b | ever been threatened with harm by husband/partner |
| d103c | ever been insulted or made to feel bad by husband/partner |
| Sexual IPV | d105h | ever been physically forced into unwanted sex by husband/partner |
| d105i | ever been forced into other unwanted sexual acts by husband/partner |
| d105k | ever been physically forced to perform sexual acts respondent didn't want to |
